# Supplementary material
Source: Springer Nature journal article supplement (https://www.springermedizin.de/resource/supplementary/12881_2008_401_MOESM3_ESM.pdf/9452850)

## NGFB expression profile in ♂♂

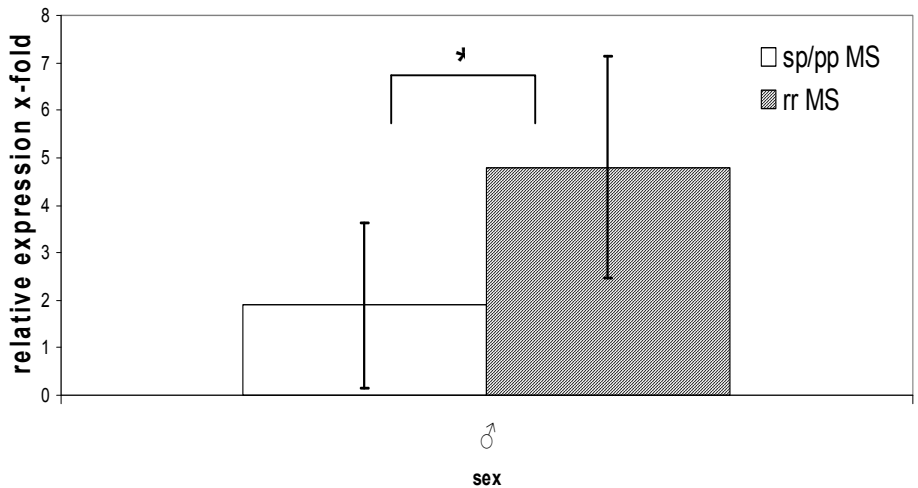

## NGFB expression profile in ♀♀

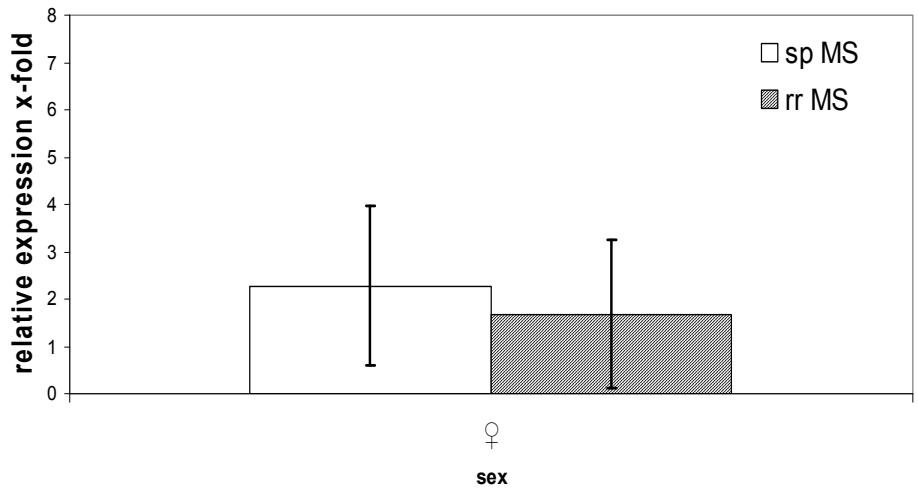

Supplement: MOESM3 [file 9452850]
